# Supplementary material for: Tris(2,2,2-trifluoroethyl) phosphite (TTFP) as a flame-retardant co-solvent to improve the safety and electrochemical performances of lithium-ion batteries
Source: Royal Society of Chemistry journal article supplement (doi:10.1039/d4nj03428g), 2024-01-01
Supplement: d4nj03428g1.pdf [file d4nj03428g1.pdf]

**Tris(2,2,2-trifluoroethyl) phosphite (TTFP) as a flame retardant  
co-solvent to improve safety and electrochemical performances  
of lithium-ion batteries**

<sup>1</sup>Caixia Huang<sup>[a]</sup>, <sup>1</sup>Lucheng Li<sup>[a]</sup>, Peng Yang<sup>[a]</sup>, and Jun Chen<sup>\*[a]</sup>

<sup>[a]</sup> *Jiangxi Key Laboratory of Power Batteries and Materials, School of Materials Science and Engineering,*

*Jiangxi University of Sciences and Technology, Ganzhou 341000. China, E-mail: chenjun@jxust.edu.cn*

<sup>1</sup> *Co-first author*

**Table S1** The data of initial charging/discharging capacity and Coulombic efficiency for batteries containing different percentages of TTFP at 4.2 V

| Samples | The initial charging capacity/mAh g <sup>-1</sup> | The initial discharging capacity/mAh g <sup>-1</sup> | The initial coulombic efficiency (ICE)/% |
|---------|---------------------------------------------------|------------------------------------------------------|------------------------------------------|
| STD     | 189.3                                             | 182.3                                                | 96.3                                     |
| 5 TTFP  | 210.5                                             | 191.6                                                | 91.0                                     |
| 10 TTFP | 254.4                                             | 205.5                                                | 80.8                                     |
| 20 TTFP | 244.1                                             | 194.5                                                | 79.7                                     |

**Table S2** Capacity retention data of TTFP batteries with different contents at 4.2 V

| Samples | The 1 <sup>st</sup> discharging capacity/mAh g <sup>-1</sup> | The 100 <sup>th</sup> discharging capacity/mAh g <sup>-1</sup> | Capacity Retention (CE)/% |
|---------|--------------------------------------------------------------|----------------------------------------------------------------|---------------------------|
| STD     | 184                                                          | 130                                                            | 69                        |
| 5 TTFP  | 188.4                                                        | 130.5                                                          | 70.9                      |
| 10 TTFP | 219.6                                                        | 162.3                                                          | 73.9                      |
| 20 TTFP | 205.6                                                        | 155.4                                                          | 75.6                      |

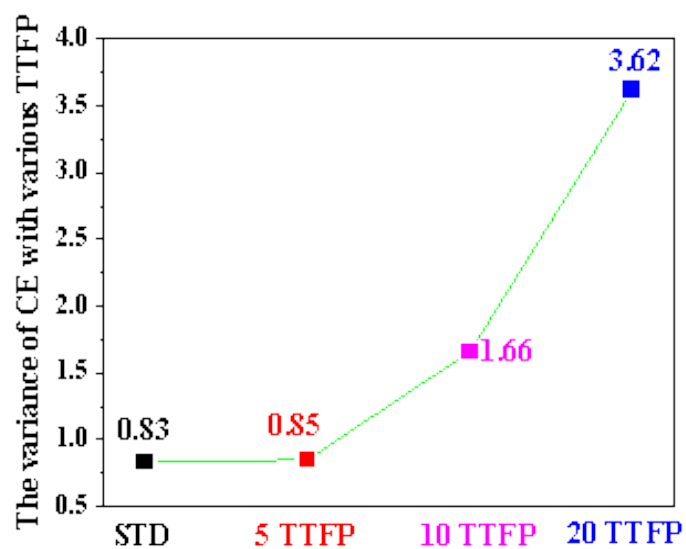

**Figure S1** The variance of CE containing different percentages of TTFP at 4.2 V.

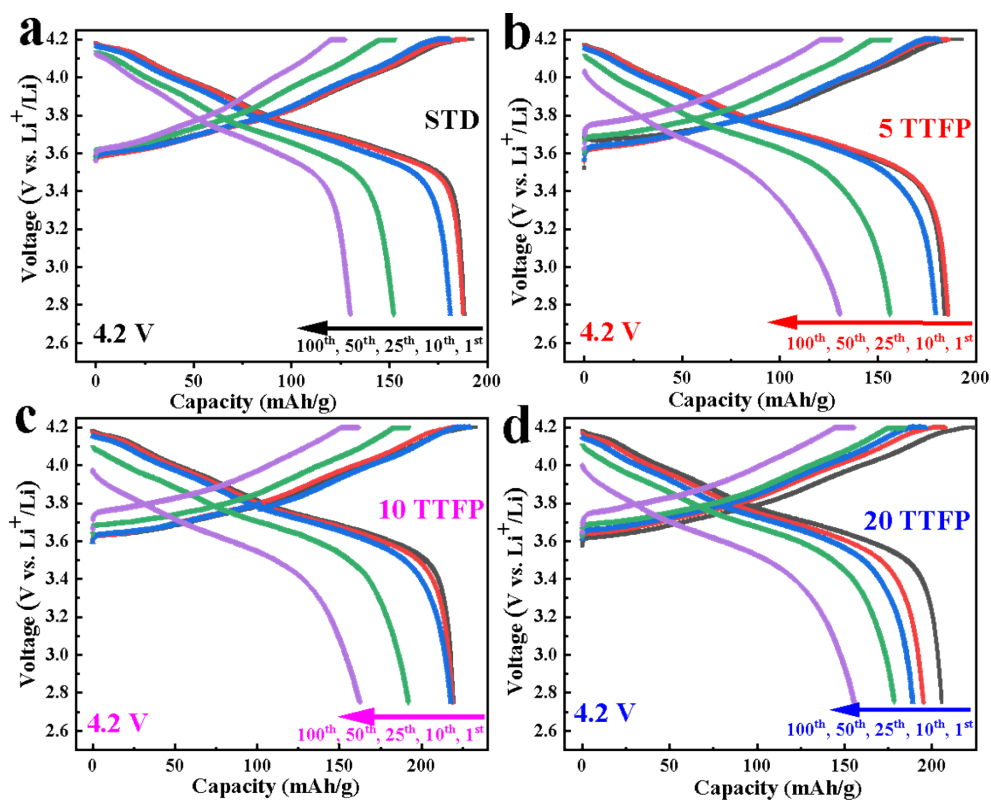

**Figure S2** Multiple selected charge/discharge curves of cells containing different percentages of TTFP at 4.2 V:

(a) STD; (b) 5 TTFP; (c) 10 TTFP; (d) 20 TTFP

**Table S3** the first charge/discharge and Coulombic efficiency data for cells containing different percentages of

TTFP at 4.5 V

| Sample  | Initial charging capacity<br>/mAh g <sup>-1</sup> | Initial discharging capacity<br>/mAh g <sup>-1</sup> | Initial Coulombic<br>Efficiency (ICE)/% |
|---------|---------------------------------------------------|------------------------------------------------------|-----------------------------------------|
| STD     | 232.5                                             | 181.2                                                | 77.9                                    |
| 10 TTFP | 240.1                                             | 229.4                                                | 95.5                                    |

**Table S4** Capacity retention data of batteries with and without TTF at 4.5 V

| Samples | The 1 <sup>st</sup> discharging<br>capacity/mAh g <sup>-1</sup> | The 100 <sup>th</sup> discharging<br>capacity/mAh g <sup>-1</sup> | Capacity Retention<br>(CE) /% |
|---------|-----------------------------------------------------------------|-------------------------------------------------------------------|-------------------------------|
| STD     | 194.8                                                           | 118.7                                                             | 60.93                         |
| 10 TTFP | 229.4                                                           | 150.0                                                             | 65.39                         |

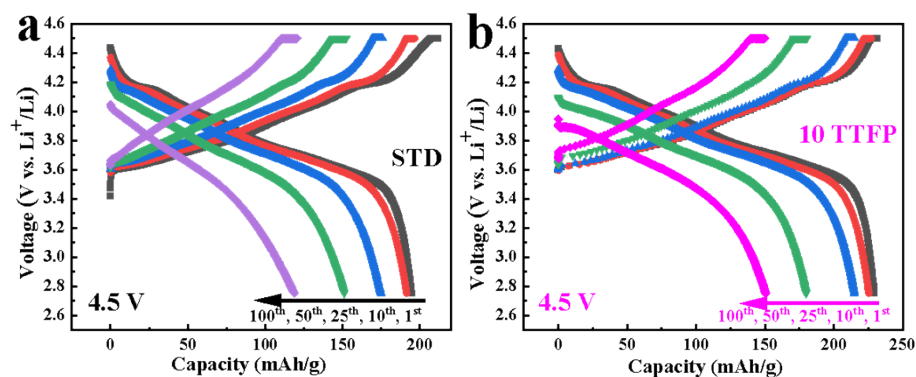

**Figure S3** Multiple selected charge/discharge curves of cells containing different percentages of TTFP at 4.5 V:

(a) STD; (b) 10 TTFP

**Table S5** Data on the 3rd cyclic voltammetry curves redox potential with and without TTPB

| Sample  | $\psi_1/\text{V}$ | $\psi_2/\text{V}$ | $\psi_{12}/\text{mV}$ | $\psi_3/\text{V}$ | $\psi_4/\text{V}$ | $\psi_{34}/\text{mV}$ |
|---------|-------------------|-------------------|-----------------------|-------------------|-------------------|-----------------------|
| STD     | 3.59              | 3.88              | 290                   | 4.27              | 4.07              | 200                   |
| 10 TTFB | 3.79              | 3.65              | 140                   | 4.23              | 4.11              | 120                   |

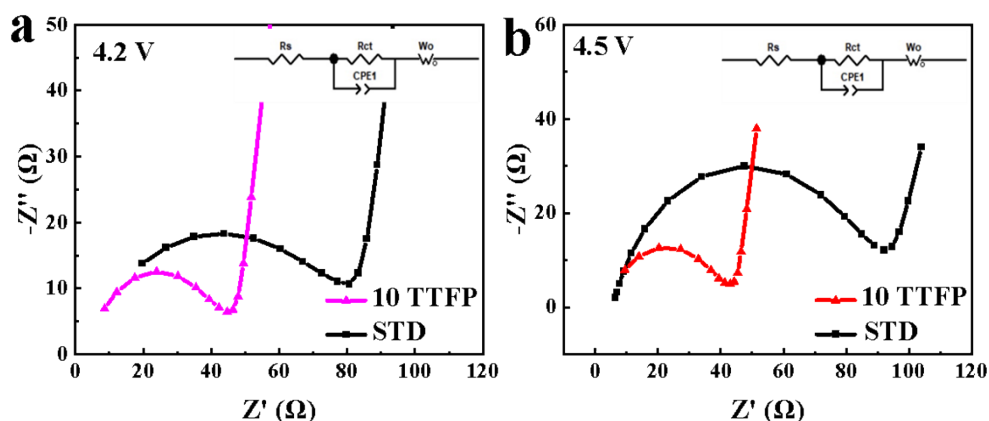

**Figure S4** Post-cycling AC impedance spectra of cells with and without TTFP at different voltages:

(a) 4.2 V; (b) 4.5 V

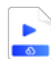

The video of  
combustion test

The video S1

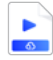

The video of  
combustion test

The video S2
